# Supplementary material for: Role of ARABIDOPSIS A-FIFTEEN in regulating leaf senescence involves response to reactive oxygen species and is dependent on ETHYLENE INSENSITIVE2
Source: PubMed Central journal article supplement — J Exp Bot. 2011 Sep 21;63(1):275–92. doi: 10.1093/jxb/err278 (PMC3245469; doi:10.1093/jxb/err278), 2011-09-21
Supplement: supp_err278_00063842_file001.pdf [file supp_err278_00063842_file001.pdf]

Role of *ARABIDOPSIS A-FIFTEEN* to regulate leaf senescence involves response to reactive oxygen species and is dependent on *ETHYLENE INSENSITIVE2*

Guan-Hong Chen, Chia-Ping Liu, Shu-Chen Grace Chen and Long-Chi Wang

**Table S1.** Prediction of chloroplast targeting peptides of AAF orthologues by TargetP1.1.

| AAF orthologues                              | Signal peptide | Specificity <sup>a</sup> |
|----------------------------------------------|----------------|--------------------------|
| ABN08080 ( <i>Medicago truncatina</i> )      | 1-21           | 0.95                     |
| ABK95826 ( <i>Populus trichocarpa</i> )      | 1-61           | 0.66                     |
| CAO17159 ( <i>Vitis vinifera</i> )           | 1-58           | 0.98                     |
| SPA15 ( <i>Ipomoea batatas</i> )             | 1-68           | 0.70                     |
| NTA15 ( <i>Nicotiana tabacum</i> )           | 1-69           | 0.65                     |
| AAF ( <i>Arabidopsis thaliana</i> )          | 1-36           | 0.52                     |
| ACG28979 ( <i>Zea mays</i> )                 | -              |                          |
| OSA15 ( <i>Oryza sativa</i> )                | -              |                          |
| XP-001763895 ( <i>Piscomitrella patens</i> ) | -              |                          |

<sup>a</sup> Specificity on the TargetP test sets

**Table S2.** Primers used for genotyping , RT-PCR and cloning

| <b>Primer</b>  | <b>Sequence (5'→ 3')</b>                      |
|----------------|-----------------------------------------------|
| AAF-F          | GGCGCTTTAGAGGCTGATTTAAGGCG                    |
| AAF-R          | TTCAGCGAGTCTCTGTAATGCTCCC                     |
| 18S rRNA-F     | GGGATGGGTCGGCCGGTCCGCCTT                      |
| 18S rRNA-R     | CTCCACTCCTGGTGGTGCCCTTCCG                     |
| SAG12-F        | GTCAGAACAACAGCTTGTTGATTGC                     |
| SAG12-R        | GACATCAATCCCACACAAACATACAC                    |
| SAG13-F        | GGAGTCTTGGAGGCAATGACCGCTC                     |
| SAG13-R        | ATGCGGTCCATCCGGAGAGTGAACT                     |
| aaf-a          | AGCTCGGGCAAGAGAAGATAC                         |
| aaf-b          | AACGTCCGCAATGTGTTATTAAGTTGTC                  |
| aaf-c          | CTGGAGAGCTTGAGCATTGAG                         |
| aaf-d          | CCCATTTGGACGTGAATGTAGACAC                     |
| aaf-e          | CTGTCTTCAGCGAGTCTCTGC                         |
| ATA15SpeIF1    | GGACTAGTATGGCTCTTAACGTGAGCAAGGTGG             |
| ATA15PmlIR2    | GGCACGTGTCAGATCTCATCAAGGTCACTGTG              |
| ATA15-GFP-f1   | CCCGAATTCCTTCTTCTTCGTTCTTA                    |
| ATA15-GFP-r1   | CTTGCTCACGTTAGGATCCCAT                        |
| ATA15F8        | ATGGCTCTTAACGTGAGCAAGGTTG                     |
| ATA15R9        | GATCTCATCAAGGTCACTGTC                         |
| ATA15-41F      | GGTTCATCTATTGAAGAGTTAAAGC                     |
| ATA15FL-attB1F | AAAAAGCAGGCTCCACCATGGCTCTTAACGTGAGCAAG        |
| ATA1540-attB2R | AGAAAGCTGGGTCCGGATCMTACTTATTAGCAGCTAAAGGATGAT |
| SPA15-attB1F   | AAAAAGCAGGCTCCACCATGGCCAAACCTAATGGGATTATC     |
| SPA15-attB1R   | AGAAAGCTGGGTCCGGATCGCTATCTACATCGTCATCTTCTTG   |

**Table S3.** Primers used for quantitative PCR

| <b>Primer</b> | <b>Sequence (5'→3')</b>       |
|---------------|-------------------------------|
| qAAF-F        | TGCAGGAATGGGAGCATTACAGAG      |
| qAAF-R        | TTCAGCGCATTGATCGCTCTCG        |
| qSAG12-F      | ACAAAGGCGAAGACGCTACTTG        |
| qSAG12-R      | ACCGGGACATCCTCATAACCTG        |
| qSAG13-F      | GCTTTCCATCTCTCACAGCTTGCC      |
| qSAG13-R      | GCCAGCTGATTCATGGCTCCTTTG      |
| qAt5g59310-F  | TCCTGGAAAGTGCGGTGTTAGC        |
| qAt5g59310-R  | TTCACCTTGATGGTGGCGCAGTTG      |
| qAt2g26020-F  | CGCTGCTCTTGTTCTCTTTGCAG       |
| qAt2g26020-R  | TCTCGCACAACTTCTGTGCTTC        |
| qAt5g44420-F  | ACACAACACATACATCTATACATT      |
| qAt5g44420-R  | TATATTATTGTAACAACAACGGGA      |
| qAt4g17500-F  | ATGTCGATGACGGCGGATTCTC        |
| qAt4g17500-R  | CGGCTCCGATTCTCCTAGTAAGTG      |
| qAt3g04720-F  | GCGGCAAGTGTTTAAGGGTGAAG       |
| qAt3g04720-R  | TCCAAATCCAAGCCTCCGTTGC        |
| qAt2g43570-F  | TTCGGTGCTTCCATCTCCAAACG       |
| qAt2g43570-R  | TGAACCCTGTTTCTTGGGCTACG       |
| qAt1g06290-F  | ATGTATTGATGCAGCAGGTGAGC       |
| qAt1g06290-R  | TCATGTGCTCCAATCCCAGTCC        |
| qSEN1-F       | GCCATCGACGAGAGACTCAAAGAG      |
| qSEN1-R       | CCTCAGCACCTTTCCATTTCCAC       |
| qAt5g37940-F  | GGATCCATGGCGTTCTAGTCAAG       |
| qAt5g37940-R  | CCAGAGATTGGCTTGCCGATAGTG      |
| qAt1g02920-F  | AGCCTTTCATCTTCCGCAACCC        |
| qAt1g02920-R  | TTGGAGCCAAGGGAGACAAGTTGG      |
| qAt4g37520-F  | TCGTTAATCTTGCGGGTGGAC         |
| qAt4g37520-R  | CGCTAGCCGCTGTTGATGATAG        |
| qAt5g58390-F  | TGGGTGCTTCTCTCCTTCGTTTG       |
| qAt5g58390-R  | AGTAAGGATCCGTCACACCCATTG      |
| qACTIN-F      | ACCTTGCTGGACGTGACCTTACTGAT    |
| qACTIN-R      | GTTGTCTCGTGGATTCCAGCAGCTT     |
| qAtEm1-F      | TTGCTGAAGGAAGGAGCAAGG         |
| qAtEm1-R      | G<br>ACCCATCTCCTGATAACCCTCGTG |
| qAtPR1-F      | ACACGTGCAATGGAGTTTGTGG        |
| qAtPR1-R      | TTGGCACATCCGAGTCTCACTG        |



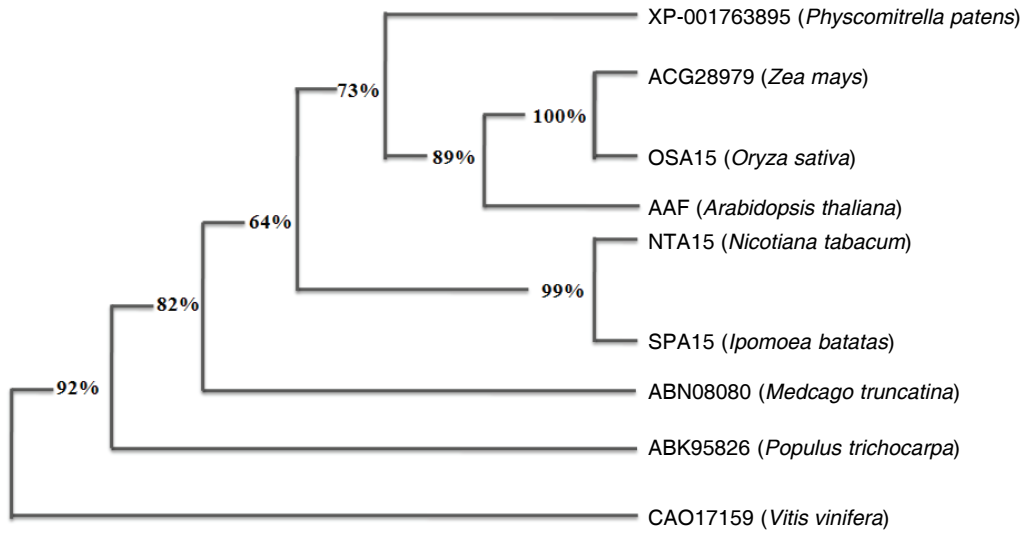

**Figure S2** . Phylogenetic tree analysis of AAF orthologues. Different orthologues of AAF were analyzed by the web-based service, POWER (<http://power.nhri.org.tw/power/home.htm> ). Multiple protein sequence alignment based on well-established methods, *ClustalW* and *PHYMLIP* in POWER.

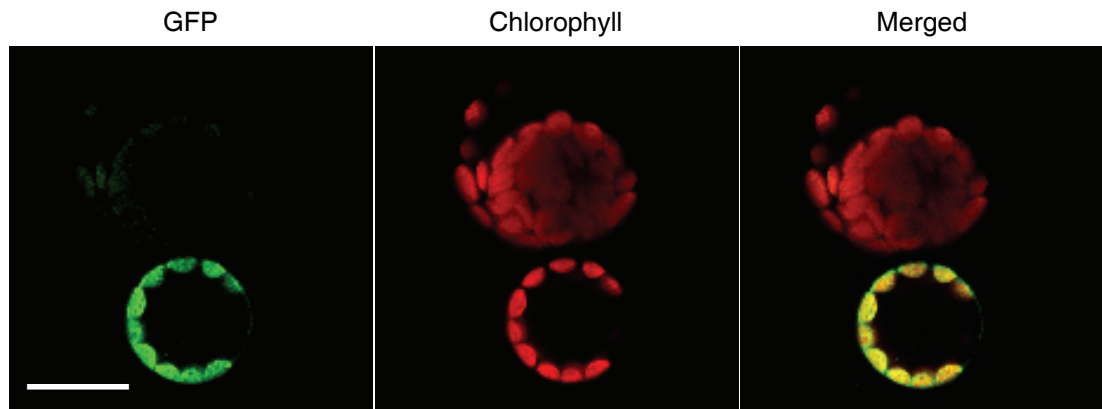

**Figure S3.** SPA15 is targeted to chloroplasts in Arabidopsis mesophyll protoplasts. Arabidopsis mesophyll protoplasts were transfected with 35S:SPA15-GFP. The fluorescence images were taken by using laser confocal confocal laser scanning microscopy (Zeiss LSM 510 Meta) with excitation at 488 nm and emission at 500-530 nm. Bar = 20  $\mu$ m

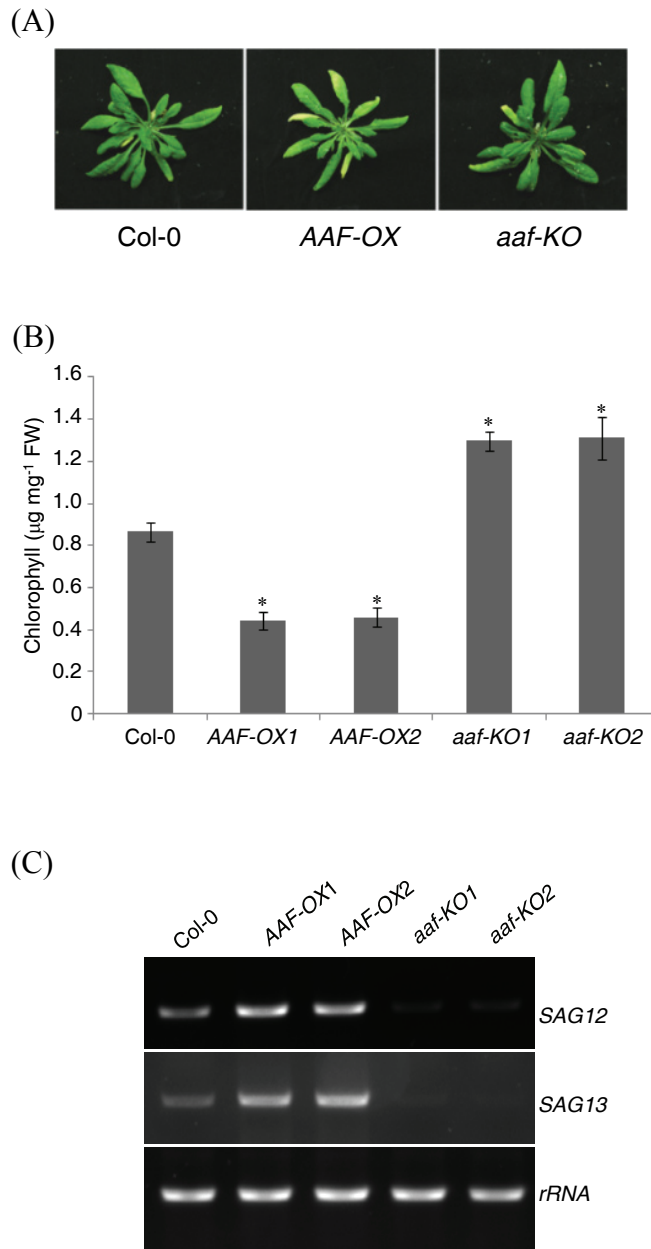

**Figure S4.** Age-dependent leaf senescence and expression of *SAG12* and *SAG13* in 7-week-old *AAF-OX* and *aaf-KO* plants. (A) Rosette leaves of 7-week-old plants. Inflorescences were removed for photograph. (B) Chlorophyll contents in rosette leaves of 7-week-old plants. \* $P < 0.01$  vs wild type, Col-0 ( $n=6$ ). Data represent means  $\pm$  SE. (C) Expression of 2 representative *SAG* genes in *AAF-OX* and *aaf-KO* plants by RT-PCR analysis.



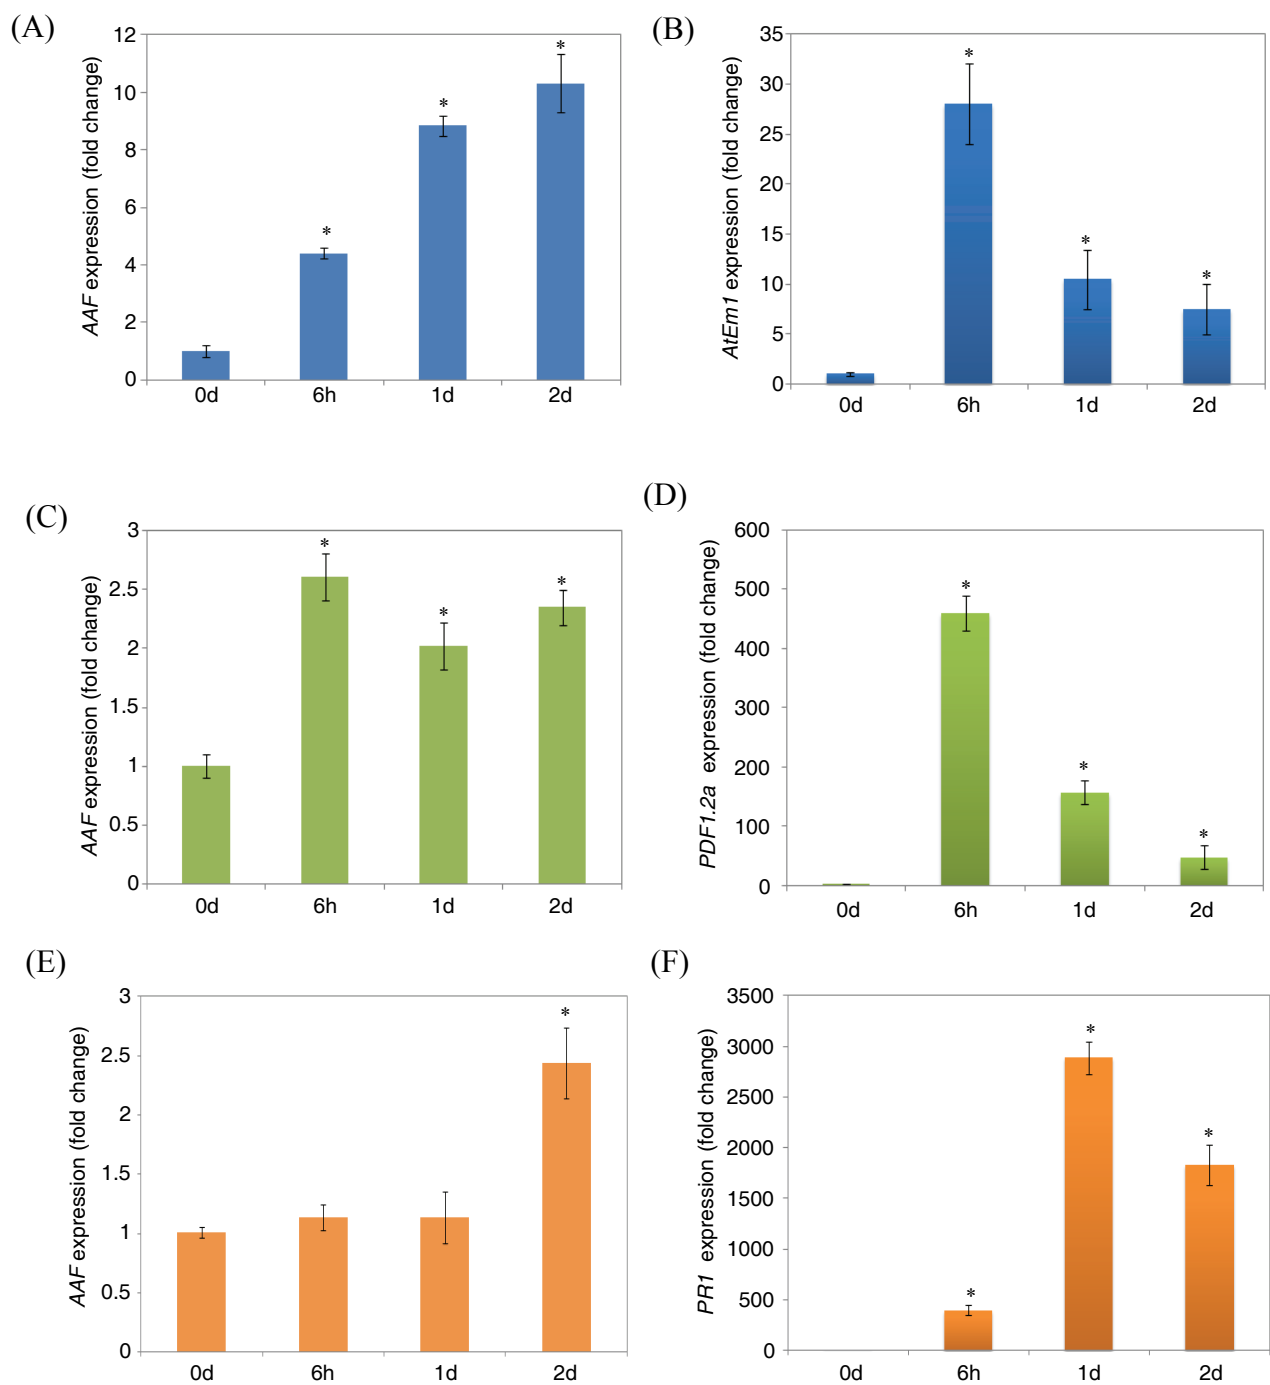

**Figure S5.** ABA, MeJA and SA can induce *AAF* expression in light-grown *Arabidopsis* seedlings. The expression level of *AAF* and hormone-responsive genes were detected by real-time PCR with 7-day-old seedlings treated by 100  $\mu$ M ABA (A, B), 100  $\mu$ M MeJA (C, D) and 100  $\mu$ M SA (E, F) in the indicated time. Fold change of Col-0 at 0 d was set as 1. \* $P < 0.01$  vs wild type, Col-0 at 0 d. Data represent means  $\pm$  SE ( $n = 3$ ). The whole experiment was repeated three times and one representative set of data is shown. Expression of *AtEm1* (At3g51810), *PDF1.2a* (At5g44420), and *PRI* (At2g14610) was used as control to validate the induction by ABA, MeJA and SA, respectively.
